# Supplementary material for: A single genus in the gut microbiome reflects host preference and specificity
Source: PubMed Central journal article supplement — ISME J. 2014 Jun 17;9(1):90–100. doi: 10.1038/ismej.2014.97 (PMC4274434; doi:10.1038/ismej.2014.97), 2014-06-17
Supplement: ismej201497x6.pdf [file ismej201497x6.pdf]

# Predicted Class

Actual Class

|         | SWINE | HUMAN | DOG | DEER | COW | CHICKEN | CAT | Class. Err. |
|---------|-------|-------|-----|------|-----|---------|-----|-------------|
| SWINE   | 12    | 0     | 0   | 0    | 0   | 0       | 0   | 0.00        |
| HUMAN   | 0     | 10    | 0   | 0    | 0   | 0       | 0   | 0.00        |
| DOG     | 0     | 0     | 9   | 0    | 0   | 0       | 0   | 0.00        |
| DEER    | 0     | 0     | 0   | 7    | 1   | 0       | 0   | 0.125       |
| COW     | 0     | 0     | 0   | 0    | 9   | 0       | 0   | 0.00        |
| CHICKEN | 0     | 0     | 0   | 0    | 0   | 9       | 0   | 0.00        |
| CAT     | 0     | 0     | 1   | 0    | 0   | 0       | 8   | 0.111       |
