# Supplementary figures and images for: A single genus in the gut microbiome reflects host preference and specificity
Source: PubMed Central journal article supplement — ISME J. 2014 Jun 17;9(1):90–100. doi: 10.1038/ismej.2014.97 (PMC4274434; doi:10.1038/ismej.2014.97), 2014-06-17

**Shannon Entropy**

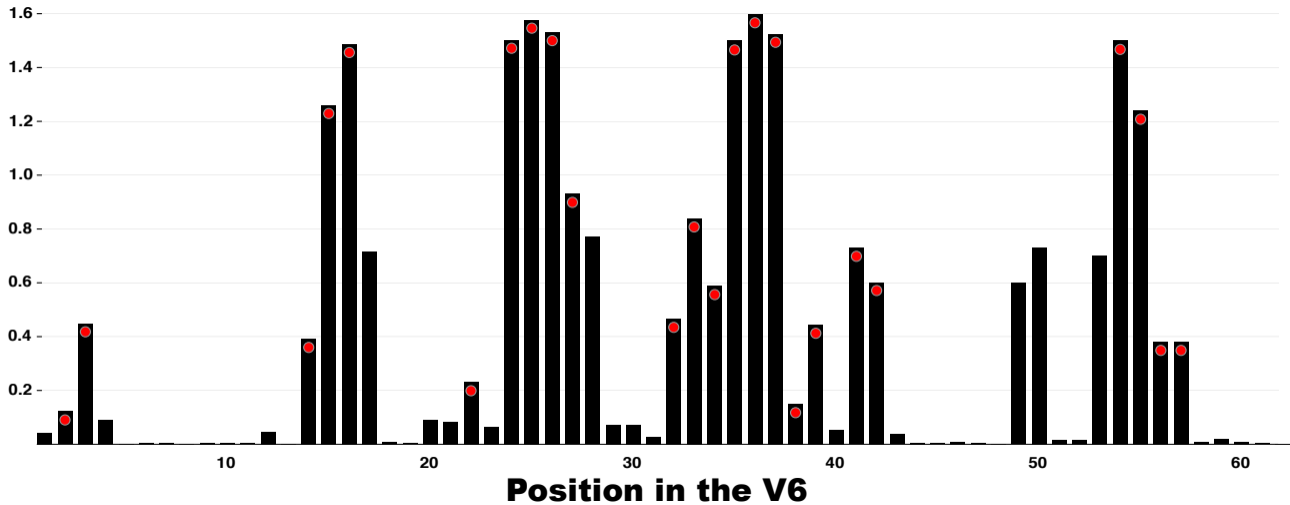

Supplement: ismej201497x2.pdf [file ismej201497x2.pdf]

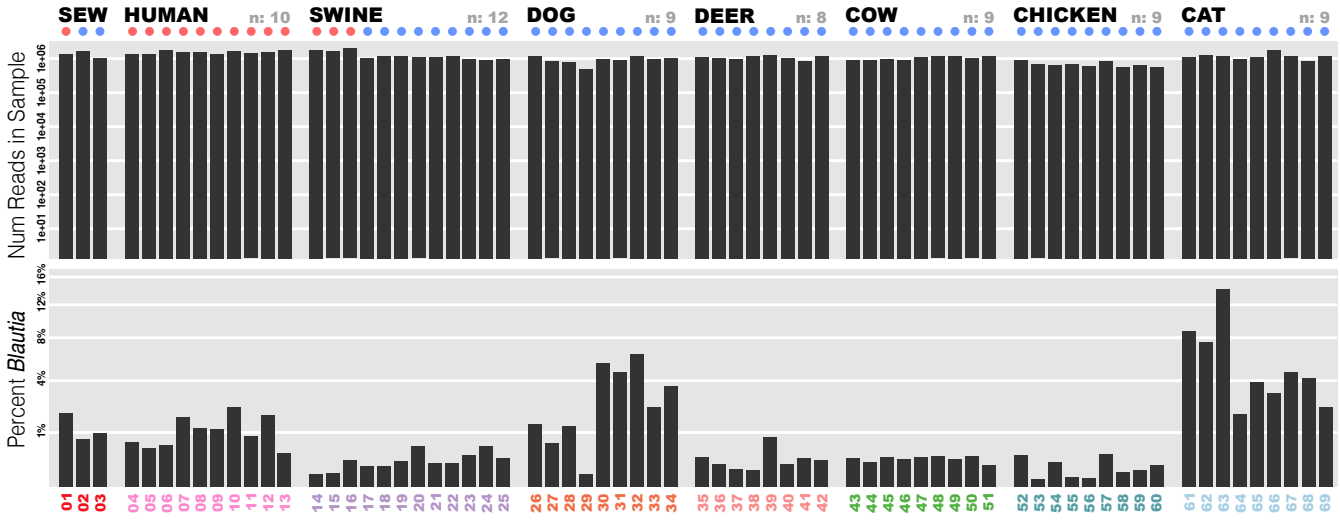

Supplement: ismej201497x3.pdf [file ismej201497x3.pdf]

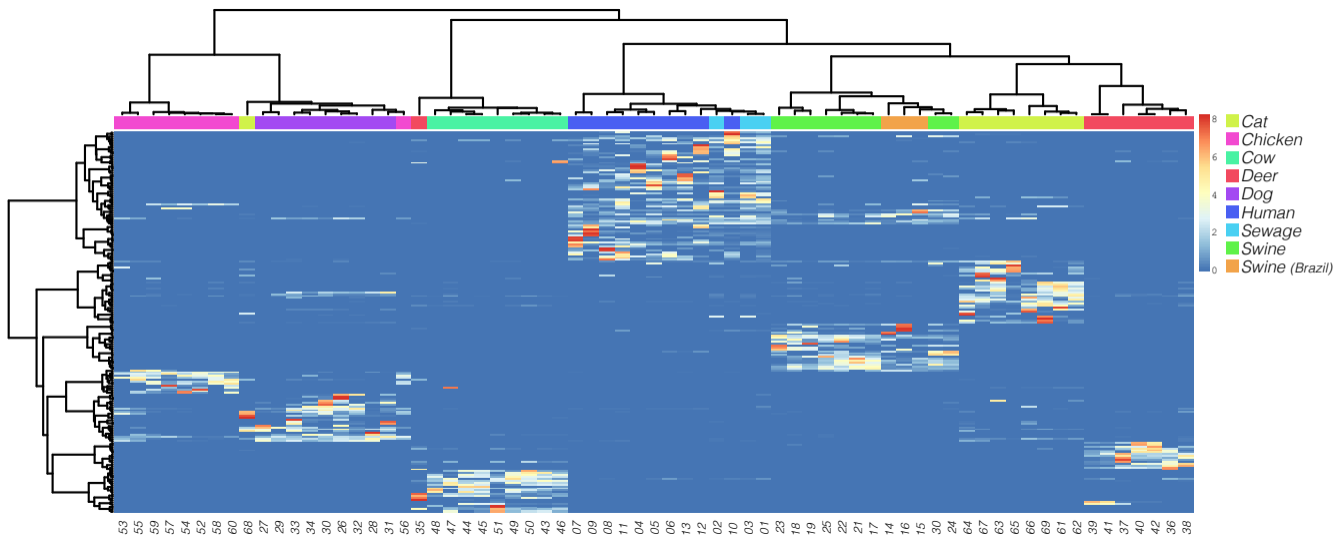

Supplement: ismej201497x4.pdf [file ismej201497x4.pdf]

MDS2

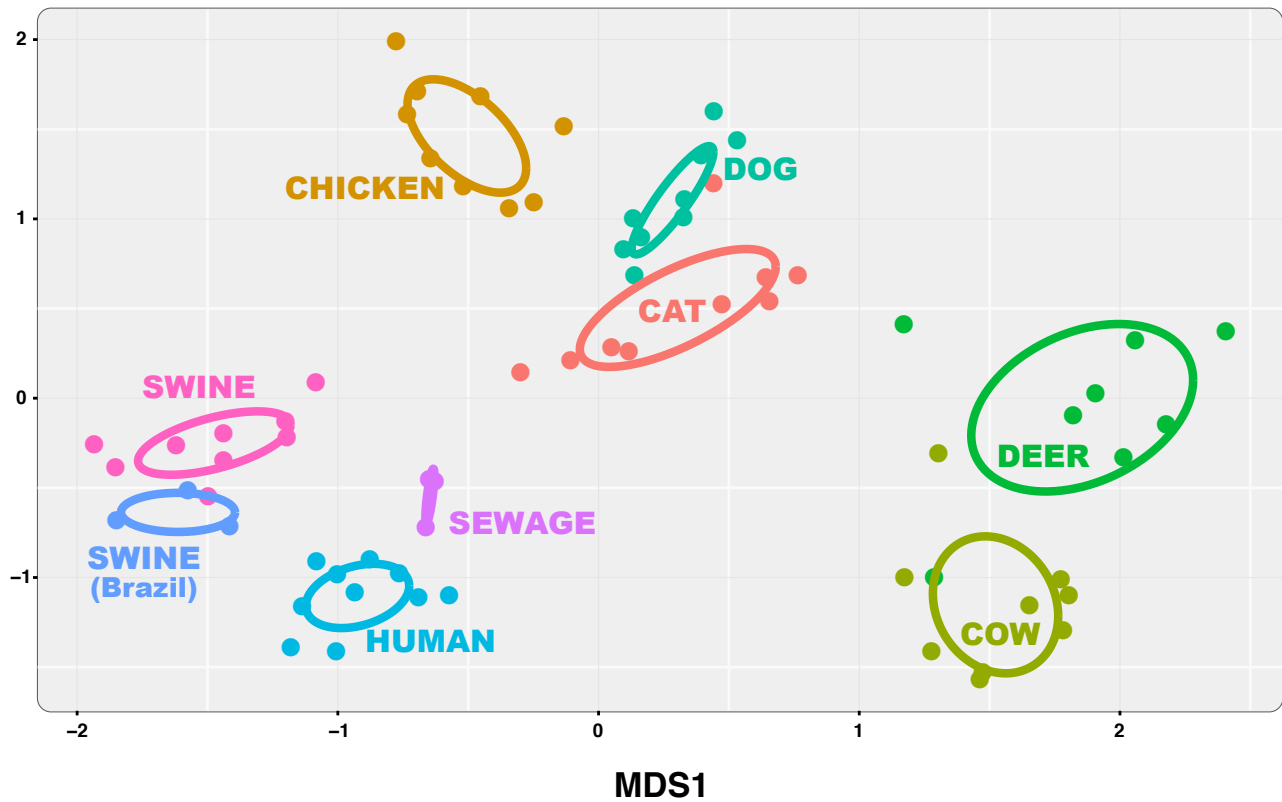

Supplement: ismej201497x5.pdf [file ismej201497x5.pdf]
